# Supplementary material for: A Near-infrared Turn-on Fluorescent Sensor for Sensitive and Specific Detection of Albumin from Urine Samples
Source: PubMed Central journal article supplement (PMC7070906; doi:10.3390/s20041232), 2020-02-24
Supplement: sensors-20-01232-s001.pdf [file sensors-20-01232-s001.pdf]

# A Near-infrared Turn-on Fluorescent Sensor for Sensitive and Specific Detection of Albumin from Urine Samples

Yoonjeong Kim <sup>1,†</sup>, Eunryeol Shin <sup>1,†</sup>, Woong Jung <sup>2</sup>, Mi Kyoung Kim <sup>1,\*</sup> and Youhoon Chong <sup>1,\*</sup>

<sup>1</sup> Department of Bioscience and Biotechnology, Bio/Molecular Informatics Center, Konkuk University, Hwayang-dong, Gwangjin-gu, Seoul 143-701, Korea; 3711992@naver.com (Y.K.); ershin94@hanmail.net (E.S.)

<sup>2</sup> Department of Emergency Medicine, Kyung Hee University Hospital at Gangdong, Seoul 134-727, Korea; ondali77@khu.ac.kr

\* Correspondence: mkkim@konkuk.ac.kr (M.K.K.); chongy@konkuk.ac.kr (Y.C.); Tel.: +82-2-2049-6100 (Y.C.)

† These two authors contributed equally on this work

Received: 26 January 2020; Accepted: 23 February 2020; Published: 24 February 2020

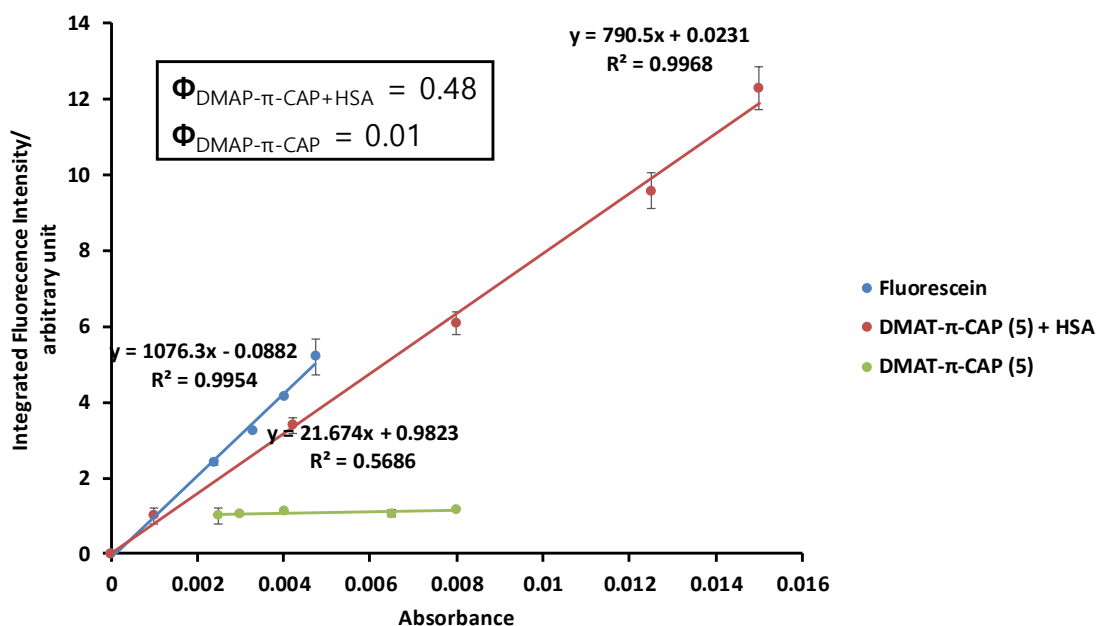

$$\Phi_X = \Phi_{ST} \left( \frac{\text{Grad}_x}{\text{Grad}_{ST}} \right) \left( \frac{\eta_x^2}{\eta_{ST}^2} \right)$$

$$\Phi_{ST} = 0.65 \text{ (fluorescein)}, \eta_x = \eta_{ST}$$

$$\text{Grad}_{ST} = 1076.3, \text{Grad}_{\text{DMAP-}\pi\text{-CAP}} = 21.7, \text{Grad}_{\text{DMAP-}\pi\text{-CAP+HSA}} = 790.5$$

$$\Phi_{\text{DMAP-}\pi\text{-CAP}} = 0.013, \Phi_{\text{DMAP-}\pi\text{-CAP+HSA}} = 0.48$$

**Figure S1.** Determination of fluorescence quantum yield of DMAT-π-CAP using fluorescein as the reference.

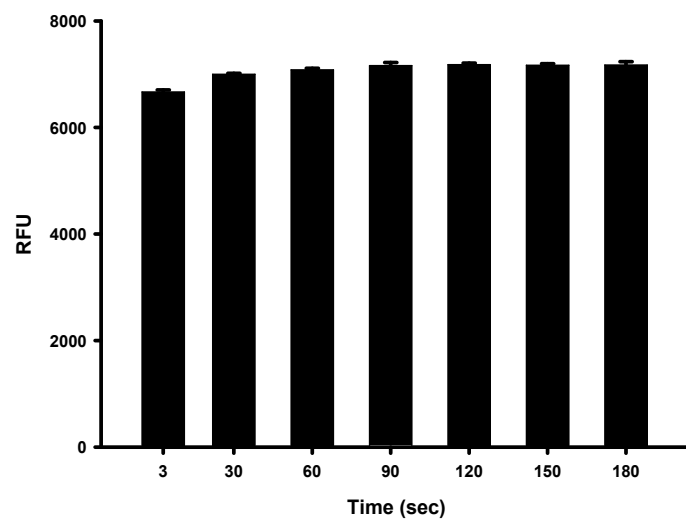

**Figure S2.** Time-dependent fluorescence intensity of DMAT- $\pi$ -CAP ( $5 \mu\text{M}$ ,  $\lambda_{\text{ex}} = 730 \text{ nm}$ ) bound to HSA ( $10 \mu\text{M}$ ).

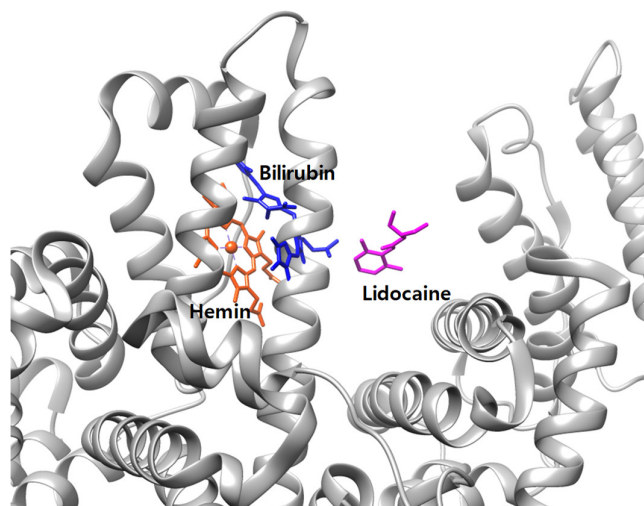

**Figure S3.** Superimposed structures of the subdomain IB of HSA complexed with hemin (PDB ID 1o9x), bilirubin (PDB ID 2vue), and lidocaine (PDB ID 3jqz)

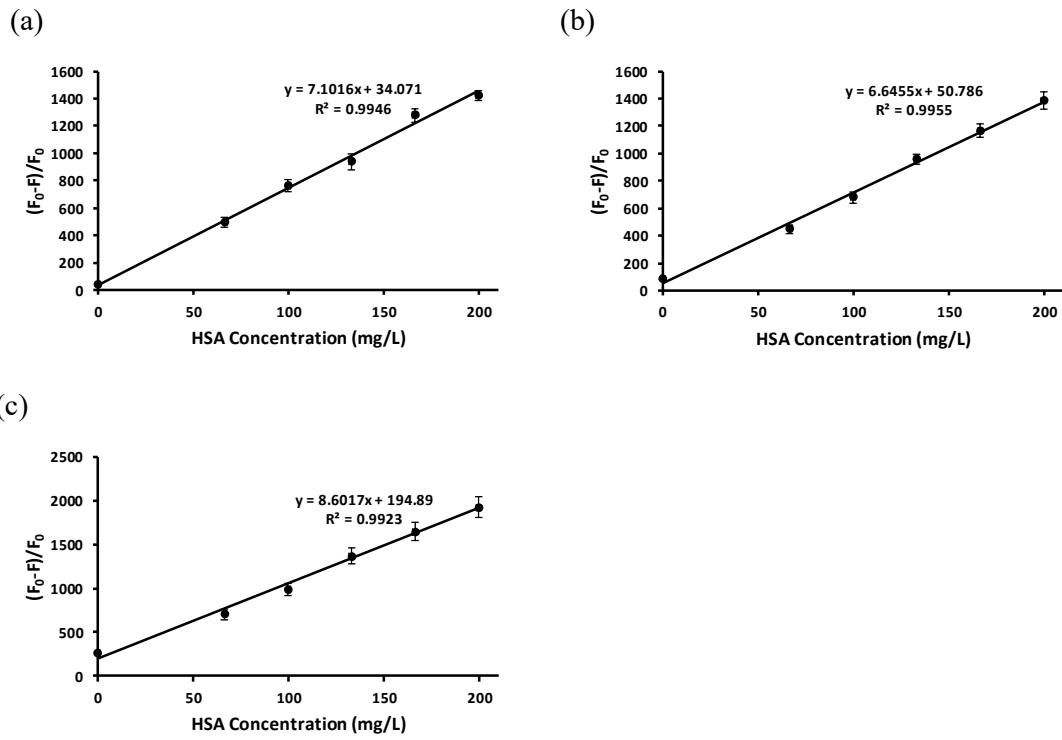

**Figure S4.** Fluorescence response of 5  $\mu$ M DMAT- $\pi$ -CAP in three different urine samples spiked with various concentrations of HSA (13.3–133.0 mg/L).  $(F_0 - F)/F_0$  indicates relative fluorescence intensity.

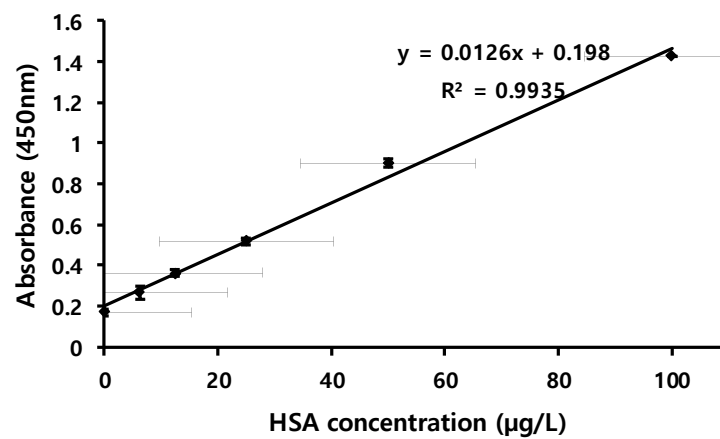

**Figure 5.** A calibration curve for human HSA immunoassay.
